# Supplementary material
Source: Springer Nature journal article supplement (https://www.springermedizin.de/resource/supplementary/13037_2014_195_MOESM5_ESM.pdf/9659530)

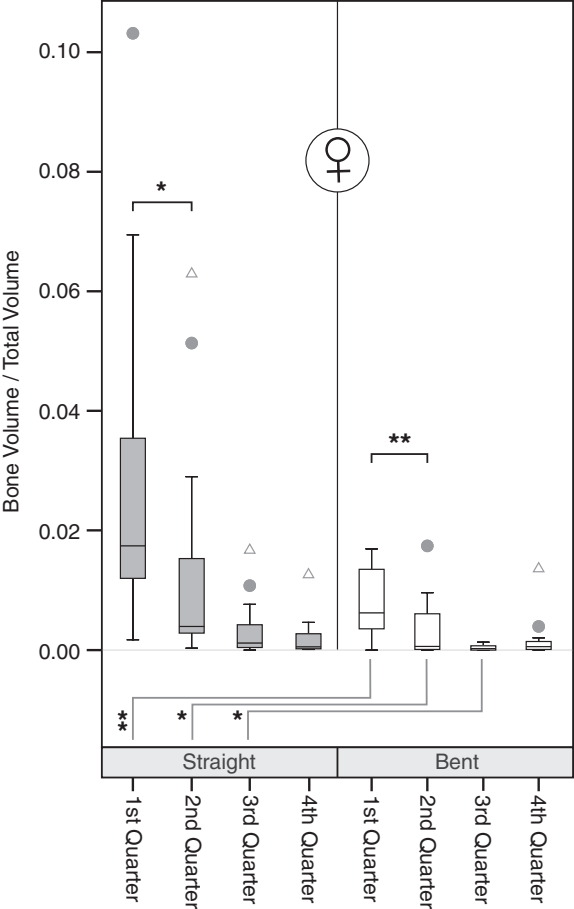

Supplement: MOESM5 [file 9659530]
